# Supplementary material for: Leveraging deep learning for identification and segmentation of “CAF-1/p60-positive” nuclei in oral squamous cell carcinoma tissue samples
Source: PubMed Central journal article supplement — J Pathol Inform. 2024 Nov 9;15:100407. doi: 10.1016/j.jpi.2024.100407 (PMC11653155; doi:10.1016/j.jpi.2024.100407), 2024-11-09
Supplement: mmc1.pdf [file mmc1.pdf]

1 Leveraging Deep Learning for Identification and  
2 Segmentation of CAF-1/p60 Positive Nuclei in  
3 Oral Squamous Cell Carcinoma Tissue Samples

4

5 November 25, 2024

6 **Supplementary material**

7 **Supplementary 1**

|                    |                     |
|--------------------|---------------------|
| criterion          | 'iou'               |
| thresh             | 0.3                 |
| fp                 | 1050                |
| tp                 | 2318                |
| fn                 | 9989                |
| precision          | 0.6882422802850356  |
| recall             | 0.18834809458032015 |
| accuracy           | 0.17354196301564723 |
| f1                 | 0.29575757575757575 |
| n_true             | 12307               |
| n_pred             | 3368                |
| mean_true_score    | 0.12096721451404742 |
| mean_matched_score | 0.6422534551442544  |
| panoptic_quality   | 0.1899513249153916  |
| by_image           | False               |

Supplementary Table S 1: Dataset matching values based on the intersection of union (iou) parameter.

## 8 **Supplementary 2**

```
9 runPlugin('qupath.imagej.detect.cells.WatershedCellDetection',
10           '{"detectionImageBrightfield":"Hematoxylin OD",
11            "backgroundByReconstruction":true,
12            "backgroundRadius":15.0,
13            "medianRadius":0.0,
14            "sigma":6.0,
15            "minArea":100.0,
16            "maxArea":1000.0,
17            "threshold":0.05,
18            "maxBackground":2.0,
19            "watershedPostProcess":true,
20            "excludeDAB":false,
21            "cellExpansion":0.0,
22            "includeNuclei":true,
23            "smoothBoundaries":true,
24            "makeMeasurements":true}')
25 setDetectionIntensityClassifications(
26     "Nucleus: DAB OD mean", 3)
27 selectObjectsByClassification("Negative");
28 clearSelectedObjects(true);
29 clearSelectedObjects();
30 .
```

Supplementary Code 1: QuPath Groovy script used for the cell detection, the classification based on the intensity of staining with DAB, and the subsequent cleaning of the detections to obtain a mask that only highlights positive cells.

### 31 **Supplementary 3**

32

```
33 from google.colab import drive
34 drive.mount('/content/drive')
```

35

```
36 !pip install StarDist
```

37

```
38 !pip install gputools
```

39

```
40 !pip install scikit-tensor-py3
```

41

42

```
43 # Commented out IPython magic to ensure Python compatibility.
```

```
44 from __future__ import print_function,
45 unicode_literals, absolute_import, division
46 import sys
```

```
47 import numpy as np
```

```
48 import matplotlib
```

```
49 matplotlib.rcParams["image.interpolation"] = "None"
```

```
50 import matplotlib.pyplot as plt
```

```
51 # %matplotlib inline
```

```
52 # %config InlineBackend.figure_format = 'retina'
```

53

```
54 from glob import glob
```

```
55 from tqdm import tqdm
```

```
56 from tiffiffle import imread
```

```
57 from csbdeep.utils import Path, normalize, download_and_extract_zip_file
```

```

58
59 from stardist import fill_label_holes ,
60 random_label_cmap , calculate_extents , gputools_available
61 from stardist.matching import matching , matching_dataset
62 from stardist.models import Config2D , StarDist2D , StarDistData2D
63
64 np.random.seed(42)
65 lbl_cmap = random_label_cmap()
66
67 gputools_available()
68
69
70 !unzip /content/drive/MyDrive/HE_p60_stardist/
71 images_masks_0909.zip -d /content/data
72
73 X = sorted(glob('/content/data/images_masks_0909/*.tif'))
74 Y = sorted(glob('/content/data/masks/*.tif'))
75 assert all(Path(x).name==Path(y).name for x,y in zip(X,Y))
76
77 X = list(map(imread,X))
78 Y = list(map(imread,Y))
79 n_channel = 1 if X[0].ndim == 2 else X[0].shape[-1]
80
81 """Normalize images and fill small label holes."""
82
83 axis_norm = (0,1) # normalize channels independently
84 # axis_norm = (0,1,2) # normalize channels jointly

```

```

85 if n_channel > 1:
86     print("Normalizing image channels %s." %
87           ('jointly' if axis_norm is None or 2 in axis_norm else 'independently'))
88     sys.stdout.flush()
89
90 X = [normalize(x,1,99.8,axis=axis_norm) for x in tqdm(X)]
91 Y = [fill_label_holes(y) for y in tqdm(Y)]
92
93 """Split into train and validation datasets."""
94
95 assert len(X) > 1, "not enough training data"
96 rng = np.random.RandomState(42)
97 ind = rng.permutation(len(X))
98 n_val = max(1, int(round(0.15 * len(ind))))
99 ind_train, ind_val = ind[:-n_val], ind[-n_val:]
100 X_val, Y_val = [X[i] for i in ind_val], [Y[i] for i in ind_val]
101 X_trn, Y_trn = [X[i] for i in ind_train], [Y[i] for i in ind_train]
102 print('number of images: %3d' % len(X))
103 print('- training:          %3d' % len(X_trn))
104 print('- validation:         %3d' % len(X_val))
105
106 """Training data consists of pairs of input image and label instances."""
107
108 def plot_img_label(img, lbl, img_title="image", lbl_title="label", **kwargs):
109     fig, (ai,al) = plt.subplots(1,2, figsize=(12,5), gridspec_kw=
110                               dict(width_ratios=(1.25,1)))
111     im = ai.imshow(img, cmap='gray', clim=(0,1))

```

```

112     ai.set_title(img_title)
113     fig.colorbar(im, ax=ai)
114     al.imshow(lbl, cmap=lbl_cmap)
115     al.set_title(lbl_title)
116     plt.tight_layout()
117
118     i = min(9, len(X)-1)
119     img, lbl = X[i], Y[i]
120     assert img.ndim in (2,3)
121     img = img if (img.ndim==2 or img.shape[-1]==3) else img[...,0]
122     plot_img_label(img, lbl)
123     None;
124
125     """# Configuration
126
127     A 'StarDist2D' model is specified via a 'Config2D' object.
128     """
129
130     print(Config2D.__doc__)
131
132     # 32 is a good default choice (see 1_data.ipynb)
133     n_rays = 32
134
135     # Use OpenCL-based computations for data generator during training (requires 'gp
136     use_gpu = True and gputools_available()
137
138     # Predict on subsampled grid for increased efficiency and larger field of view

```

```

139 grid = (2,2)
140
141 conf = Config2D (
142     n_rays      = n_rays ,
143     grid        = grid ,
144     use_gpu     = use_gpu ,
145     n_channel_in = n_channel ,
146 )
147 print(conf)
148 vars(conf)
149
150 if use_gpu:
151     from csbdeep.utils.tf import limit_gpu_memory
152     # adjust as necessary: limit GPU memory to be used by TensorFlow to leave some
153     #limit_gpu_memory(0.8)
154     # alternatively , try this:
155     limit_gpu_memory(None, allow_growth=True)
156
157 """**Note:** The trained 'StarDist2D' model will *not* predict completed shapes
158
159 model = StarDist2D(conf, name='stardist_1009', basedir='/content/model')
160
161 """Check if the neural network has a large enough field of view to see up to the
162
163 model.callbacks.append(earlystop)
164
165 median_size = calculate_extents(list(Y), np.median)

```



```

166 fov = np.array(model._axes_tile_overlap('YX'))
167 print(f"median object size:      {median_size}")
168 print(f"network field of view :  {fov}")
169 if any(median_size > fov):
170     print("WARNING: median object size larger than field of view of the neural n
171
172 """# Data Augmentation
173
174 You can define a function/callable that applies augmentation to each batch of th
175 We here use an 'augmenter' that applies random rotations, flips, and intensity c
176 """
177
178 def random_fliprot(img, mask):
179     assert img.ndim >= mask.ndim
180     axes = tuple(range(mask.ndim))
181     perm = tuple(np.random.permutation(axes))
182     img = img.transpose(perm + tuple(range(mask.ndim, img.ndim)))
183     mask = mask.transpose(perm)
184     for ax in axes:
185         if np.random.rand() > 0.5:
186             img = np.flip(img, axis=ax)
187             mask = np.flip(mask, axis=ax)
188     return img, mask
189
190 def random_intensity_change(img):
191     img = img*np.random.uniform(0.6,2) + np.random.uniform(-0.2,0.2)
192     return img

```

```

193
194
195 def augmenter(x, y):
196     """Augmentation of a single input/label image pair.
197     x is an input image
198     y is the corresponding ground-truth label image
199     """
200     x, y = random_fliprot(x, y)
201     x = random_intensity_change(x)
202     # add some gaussian noise
203     sig = 0.02*np.random.uniform(0,1)
204     x = x + sig*np.random.normal(0,1,x.shape)
205     return x, y
206
207 # plot some augmented examples
208 img, lbl = X[60],Y[60]
209 plot_img_label(img, lbl)
210 for _ in range(3):
211     img_aug, lbl_aug = augmenter(img, lbl)
212     plot_img_label(img_aug, lbl_aug, img_title="image augmented", lbl_title="lab
213
214 """# Training"""
215
216 import tensorflow as tf
217
218 reduce_lr = tf.keras.callbacks.ReduceLROnPlateau(monitor='val_loss', factor=0.2,
219                                                  patience=5, min_lr=0.001)

```

```

220  '''
221  earlystop = tf.keras.callbacks.EarlyStopping(
222      monitor="val_loss",
223      min_delta=0.01,
224      patience=20,
225      verbose=1,
226      mode="auto",
227      baseline=None,
228      restore_best_weights=True,
229      start_from_epoch=100,
230  )
231  #model.train(X_trn, Y_trn, callbacks=[reduce_lr])
232  '''
233
234  model.prepare_for_training()
235
236  model.callbacks.append(reduce_lr)
237
238
239  # Commented out IPython magic to ensure Python compatibility.
240  # %load_ext tensorboard
241  # %tensorboard --logdir /content/model/stardist_1009/logs/
242
243  !pip install pyopencl
244
245  '''
246  quick_demo = False

```

```

247
248 if quick_demo:
249     print (
250         "NOTE: This is only for a quick demonstration!\n"
251         "     Please set the variable 'quick_demo = False' for proper (long) tr
252         file=sys.stderr, flush=True
253     )
254     model.train(X_trn, Y_trn, validation_data=(X_val,Y_val), augmenter=augmenter
255                 epochs=2, steps_per_epoch=10)
256
257     print("=====> Stopping training and loading previously trained demo model from
258     model = StarDist2D.from_pretrained('2D_demo')
259 else:
260     model.train(X_trn, Y_trn, validation_data=(X_val,Y_val), augmenter=augmenter
261     None;
262     '''
263
264     model.train(X_trn, Y_trn, validation_data=(X_val,Y_val), augmenter=augmenter, ep
265
266
267     model.optimize_thresholds(X_val, Y_val)
268
269     help(matching)
270
271     Y_val_pred = [model.predict_instances(x, n_tiles=model._guess_n_tiles(x), show_
272                 for x in tqdm(X_val))]
273

```

```

274 plot_img_label(X_val[10],Y_val[10], lbl_title="label GT")
275 plot_img_label(X_val[10],Y_val_pred[10], lbl_title="label Pred")
276
277 taus = [0.1, 0.2, 0.3, 0.4, 0.5, 0.6, 0.7, 0.8, 0.9]
278 stats = [matching_dataset(Y_val, Y_val_pred, thresh=t, show_progress=False) for
279
280 stats [taus.index(0.3)]
281
282 fig, (ax1,ax2) = plt.subplots(1,2, figsize=(15,5))
283
284 for m in ('precision', 'recall', 'accuracy', 'f1', 'mean_true_score', 'mean_mat
285     ax1.plot(taus, [s._asdict()[m] for s in stats], '-.', lw=2, label=m)
286 ax1.set_xlabel(r'IoU threshold $\tau$')
287 ax1.set_ylabel('Metric value')
288 ax1.grid()
289 ax1.legend()
290
291 for m in ('fp', 'tp', 'fn'):
292     ax2.plot(taus, [s._asdict()[m] for s in stats], '-.', lw=2, label=m)
293 ax2.set_xlabel(r'IoU threshold $\tau$')
294 ax2.set_ylabel('Number #')
295 ax2.grid()
296 ax2.legend();

```

## 297 **Supplementary 4**

```

298
299 Config2D(n_dim=2, axes='YXC', n_channel_in=3, n_channel_out=33, train_checkpoint

```

```

300 {'n_dim': 2,
301      'axes': 'YXC',
302      'n_channel_in': 3,
303      'n_channel_out': 33,
304      'train_checkpoint': 'weights_best.h5',
305      'train_checkpoint_last': 'weights_last.h5',
306      'train_checkpoint_epoch': 'weights_now.h5',
307      'n_rays': 32,
308      'grid': (2, 2),
309      'backbone': 'unet',
310      'n_classes': None,
311      'unet_n_depth': 3,
312      'unet_kernel_size': (3, 3),
313      'unet_n_filter_base': 32,
314      'unet_n_conv_per_depth': 2,
315      'unet_pool': (2, 2),
316      'unet_activation': 'relu',
317      'unet_last_activation': 'relu',
318      'unet_batch_norm': False,
319      'unet_dropout': 0.0,
320      'unet_prefix': '',
321      'net_conv_after_unet': 128,
322      'net_input_shape': (None, None, 3),
323      'net_mask_shape': (None, None, 1),
324      'train_shape_completion': False,
325      'train_completion_crop': 32,
326      'train_patch_size': (256, 256),

```

```
327 'train_background_reg': 0.0001,  
328 'train_foreground_only': 0.9,  
329 'train_sample_cache': True,  
330 'train_dist_loss': 'mae',  
331 'train_loss_weights': (1, 0.2),  
332 'train_class_weights': (1, 1),  
333 'train_epochs': 800,  
334 'train_steps_per_epoch': 100,  
335 'train_learning_rate': 0.0003,  
336 'train_batch_size': 4,  
337 'train_n_val_patches': None,  
338 'train_tensorboard': True,  
339 'train_reduce_lr': {'factor': 0.5, 'patience': 40, 'min_delta': 0},  
340 'use_gpu': True}
```
